# CORRECTION

## Correction: The Value of Long-Term Stream Invertebrate Data Collected by Citizen Scientists

The *PLOS ONE* Staff

### Notice of Republication

This article was republished on May 13, 2016, to correct errors that were introduced during preparation of the manuscript for publication: Figs 5–7 were swapped and S1 Fig was incorrect. The publisher apologizes for the errors. Please download this article again to view the correct version. The originally published, uncorrected article and the republished, corrected article are provided here for reference.

### Supporting Information

**S1 File. Originally published, uncorrected article.**  
(PDF)

**S2 File. Republished, corrected article.**  
(PDF)

### Reference

1. Edwards PM (2016) The Value of Long-Term Stream Invertebrate Data Collected by Citizen Scientists. *PLoS ONE* 11(4): e0153713. doi:[10.1371/journal.pone.0153713](https://doi.org/10.1371/journal.pone.0153713) PMID: [27119850](https://pubmed.ncbi.nlm.nih.gov/27119850/)

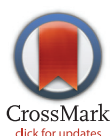

### OPEN ACCESS

**Citation:** The *PLOS ONE* Staff (2016) Correction: The Value of Long-Term Stream Invertebrate Data Collected by Citizen Scientists. *PLoS ONE* 11(5): e0156435. doi:[10.1371/journal.pone.0156435](https://doi.org/10.1371/journal.pone.0156435)

**Published:** May 23, 2016

**Copyright:** © 2016 The PLOS ONE Staff. This is an open access article distributed under the terms of the [Creative Commons Attribution License](https://creativecommons.org/licenses/by/4.0/), which permits unrestricted use, distribution, and reproduction in any medium, provided the original author and source are credited.
